# Supplementary material (part 1 of 2)
Source: ML conference proceedings conference paper supplement (https://proceedings.neurips.cc/paper_files/paper/2021/hash/bf1b2f4b901c21a1d8645018ea9aeb05-Abstract.html)

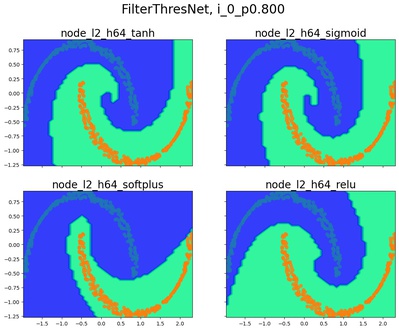

Supplement: Supplementary file 1 [file bf1b2f4b901c21a1d8645018ea9aeb05-Supplemental.zip › ablation_study/classification_moons/activation_sweep_structured/i_0_p0.800.jpg]

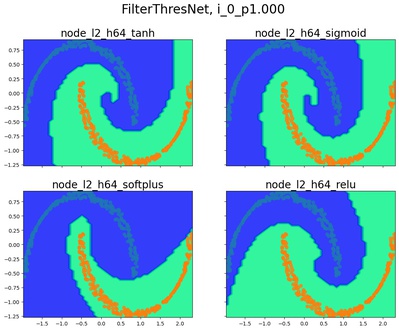

Supplement: Supplementary file 1 [file bf1b2f4b901c21a1d8645018ea9aeb05-Supplemental.zip › ablation_study/classification_moons/activation_sweep_structured/i_00_p1.000.jpg]

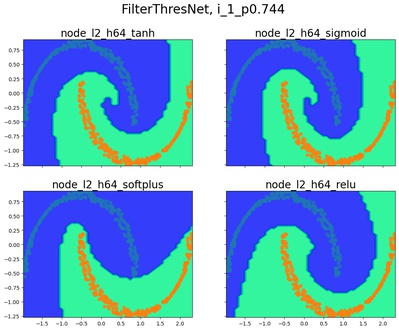

Supplement: Supplementary file 1 [file bf1b2f4b901c21a1d8645018ea9aeb05-Supplemental.zip › ablation_study/classification_moons/activation_sweep_structured/i_1_p0.744.jpg]

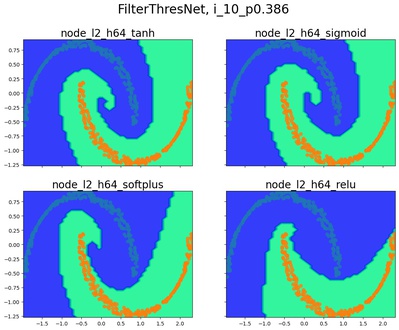

Supplement: Supplementary file 1 [file bf1b2f4b901c21a1d8645018ea9aeb05-Supplemental.zip › ablation_study/classification_moons/activation_sweep_structured/i_10_p0.386.jpg]

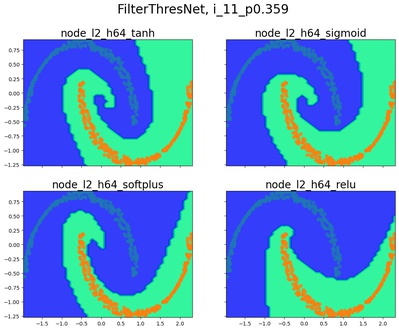

Supplement: Supplementary file 1 [file bf1b2f4b901c21a1d8645018ea9aeb05-Supplemental.zip › ablation_study/classification_moons/activation_sweep_structured/i_11_p0.359.jpg]

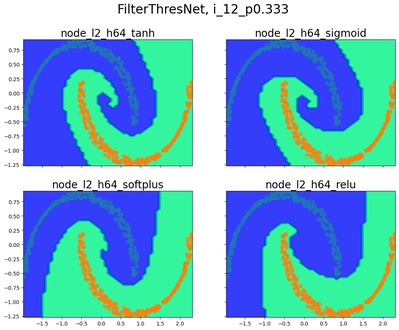

Supplement: Supplementary file 1 [file bf1b2f4b901c21a1d8645018ea9aeb05-Supplemental.zip › ablation_study/classification_moons/activation_sweep_structured/i_12_p0.333.jpg]

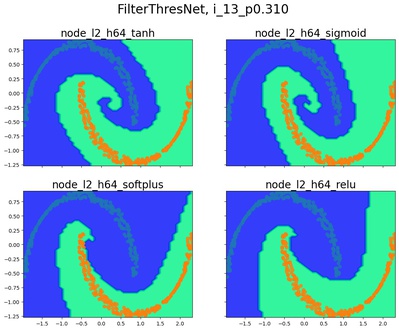

Supplement: Supplementary file 1 [file bf1b2f4b901c21a1d8645018ea9aeb05-Supplemental.zip › ablation_study/classification_moons/activation_sweep_structured/i_13_p0.310.jpg]

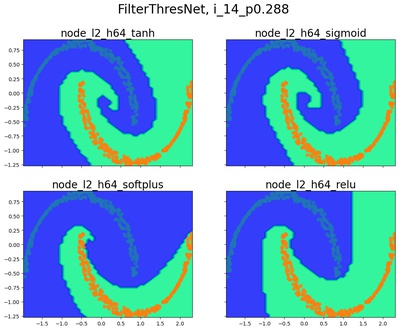

Supplement: Supplementary file 1 [file bf1b2f4b901c21a1d8645018ea9aeb05-Supplemental.zip › ablation_study/classification_moons/activation_sweep_structured/i_14_p0.288.jpg]

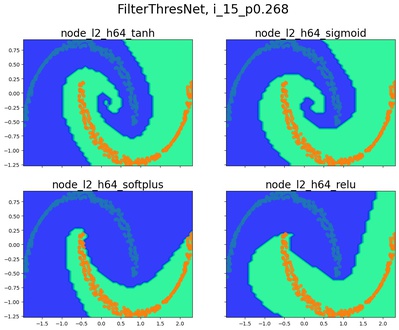

Supplement: Supplementary file 1 [file bf1b2f4b901c21a1d8645018ea9aeb05-Supplemental.zip › ablation_study/classification_moons/activation_sweep_structured/i_15_p0.268.jpg]

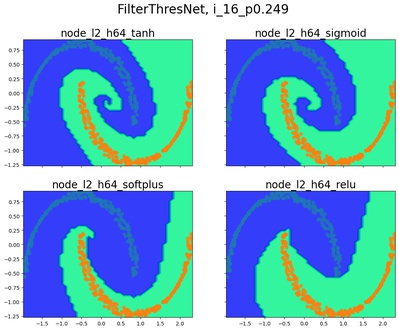

Supplement: Supplementary file 1 [file bf1b2f4b901c21a1d8645018ea9aeb05-Supplemental.zip › ablation_study/classification_moons/activation_sweep_structured/i_16_p0.249.jpg]

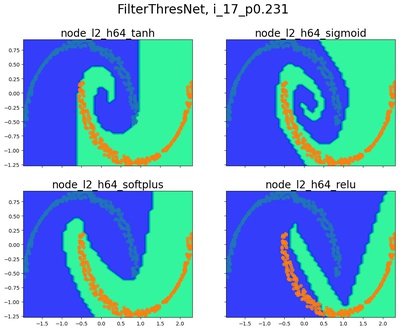

Supplement: Supplementary file 1 [file bf1b2f4b901c21a1d8645018ea9aeb05-Supplemental.zip › ablation_study/classification_moons/activation_sweep_structured/i_17_p0.231.jpg]

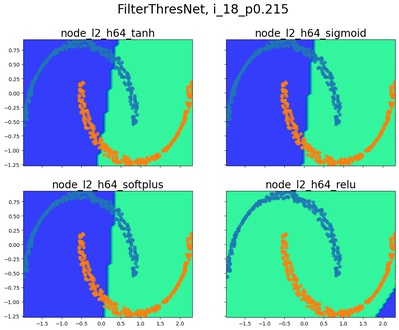

Supplement: Supplementary file 1 [file bf1b2f4b901c21a1d8645018ea9aeb05-Supplemental.zip › ablation_study/classification_moons/activation_sweep_structured/i_18_p0.215.jpg]

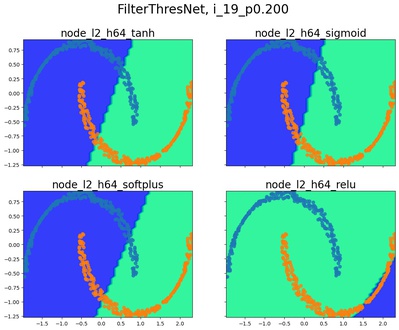

Supplement: Supplementary file 1 [file bf1b2f4b901c21a1d8645018ea9aeb05-Supplemental.zip › ablation_study/classification_moons/activation_sweep_structured/i_19_p0.200.jpg]

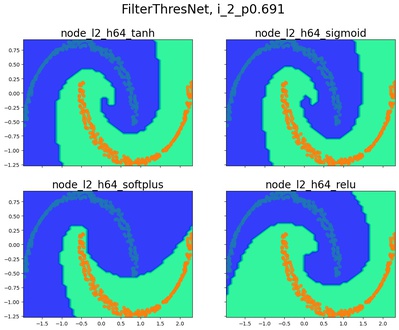

Supplement: Supplementary file 1 [file bf1b2f4b901c21a1d8645018ea9aeb05-Supplemental.zip › ablation_study/classification_moons/activation_sweep_structured/i_2_p0.691.jpg]

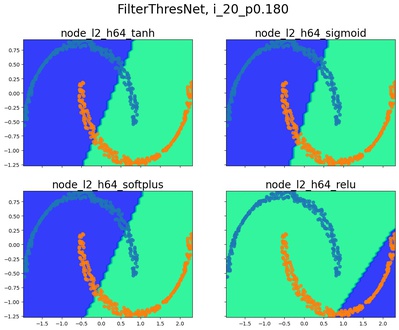

Supplement: Supplementary file 1 [file bf1b2f4b901c21a1d8645018ea9aeb05-Supplemental.zip › ablation_study/classification_moons/activation_sweep_structured/i_20_p0.180.jpg]

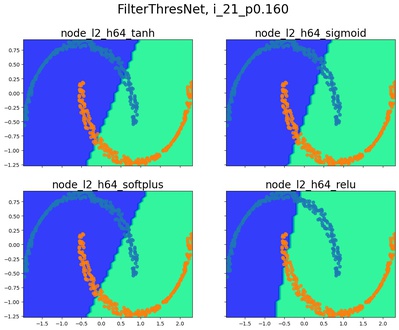

Supplement: Supplementary file 1 [file bf1b2f4b901c21a1d8645018ea9aeb05-Supplemental.zip › ablation_study/classification_moons/activation_sweep_structured/i_21_p0.160.jpg]

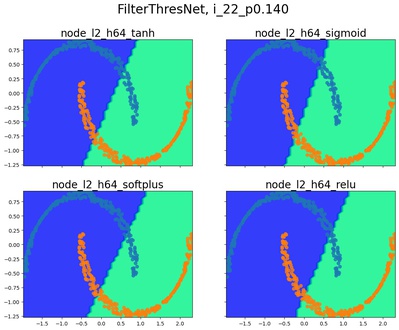

Supplement: Supplementary file 1 [file bf1b2f4b901c21a1d8645018ea9aeb05-Supplemental.zip › ablation_study/classification_moons/activation_sweep_structured/i_22_p0.140.jpg]

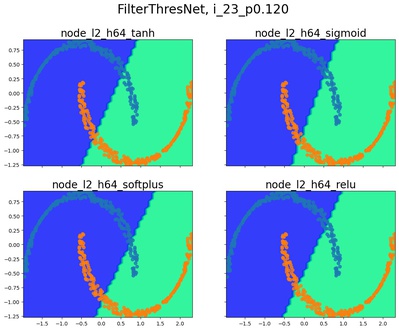

Supplement: Supplementary file 1 [file bf1b2f4b901c21a1d8645018ea9aeb05-Supplemental.zip › ablation_study/classification_moons/activation_sweep_structured/i_23_p0.120.jpg]

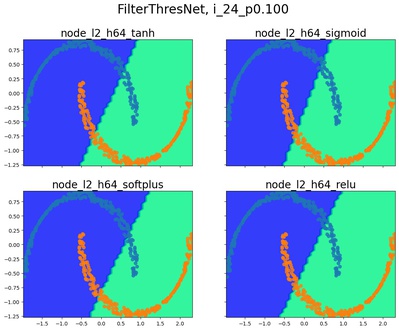

Supplement: Supplementary file 1 [file bf1b2f4b901c21a1d8645018ea9aeb05-Supplemental.zip › ablation_study/classification_moons/activation_sweep_structured/i_24_p0.100.jpg]

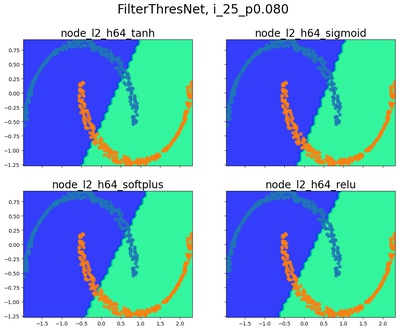

Supplement: Supplementary file 1 [file bf1b2f4b901c21a1d8645018ea9aeb05-Supplemental.zip › ablation_study/classification_moons/activation_sweep_structured/i_25_p0.080.jpg]

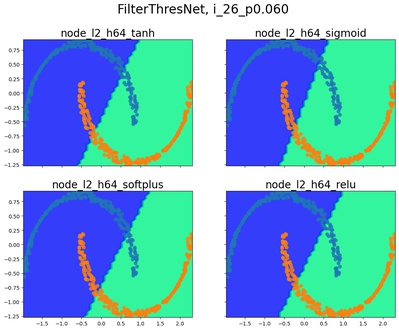

Supplement: Supplementary file 1 [file bf1b2f4b901c21a1d8645018ea9aeb05-Supplemental.zip › ablation_study/classification_moons/activation_sweep_structured/i_26_p0.060.jpg]

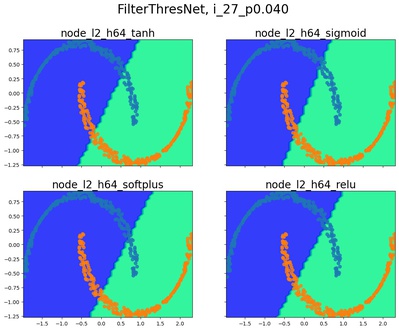

Supplement: Supplementary file 1 [file bf1b2f4b901c21a1d8645018ea9aeb05-Supplemental.zip › ablation_study/classification_moons/activation_sweep_structured/i_27_p0.040.jpg]

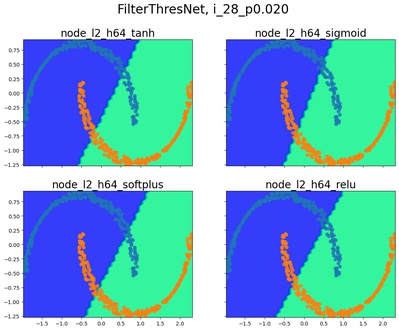

Supplement: Supplementary file 1 [file bf1b2f4b901c21a1d8645018ea9aeb05-Supplemental.zip › ablation_study/classification_moons/activation_sweep_structured/i_28_p0.020.jpg]

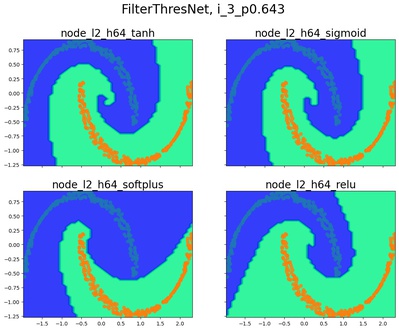

Supplement: Supplementary file 1 [file bf1b2f4b901c21a1d8645018ea9aeb05-Supplemental.zip › ablation_study/classification_moons/activation_sweep_structured/i_3_p0.643.jpg]

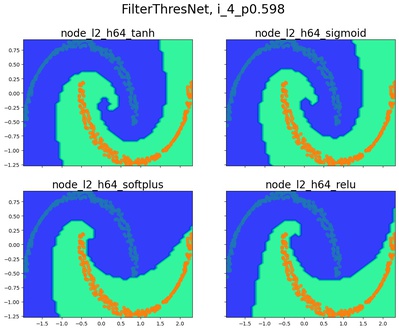

Supplement: Supplementary file 1 [file bf1b2f4b901c21a1d8645018ea9aeb05-Supplemental.zip › ablation_study/classification_moons/activation_sweep_structured/i_4_p0.598.jpg]

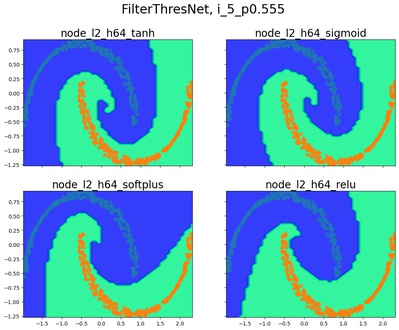

Supplement: Supplementary file 1 [file bf1b2f4b901c21a1d8645018ea9aeb05-Supplemental.zip › ablation_study/classification_moons/activation_sweep_structured/i_5_p0.555.jpg]

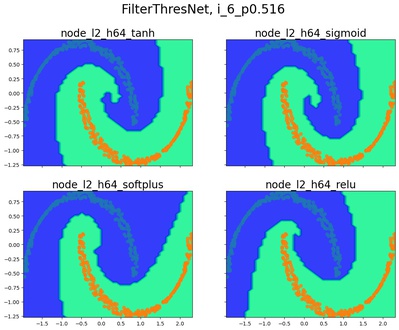

Supplement: Supplementary file 1 [file bf1b2f4b901c21a1d8645018ea9aeb05-Supplemental.zip › ablation_study/classification_moons/activation_sweep_structured/i_6_p0.516.jpg]

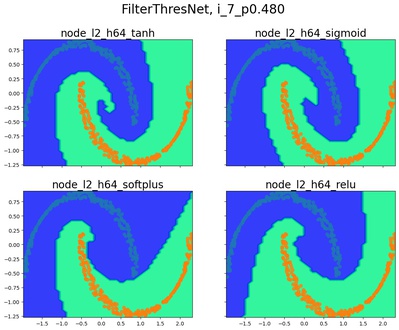

Supplement: Supplementary file 1 [file bf1b2f4b901c21a1d8645018ea9aeb05-Supplemental.zip › ablation_study/classification_moons/activation_sweep_structured/i_7_p0.480.jpg]

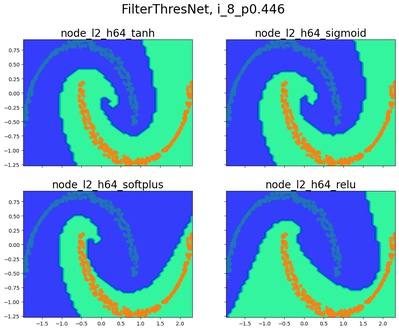

Supplement: Supplementary file 1 [file bf1b2f4b901c21a1d8645018ea9aeb05-Supplemental.zip › ablation_study/classification_moons/activation_sweep_structured/i_8_p0.446.jpg]

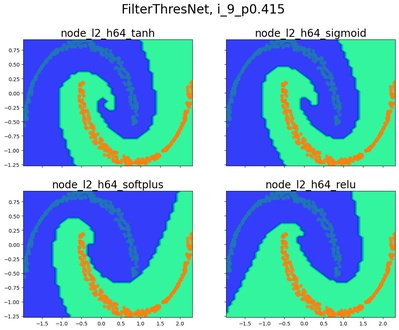

Supplement: Supplementary file 1 [file bf1b2f4b901c21a1d8645018ea9aeb05-Supplemental.zip › ablation_study/classification_moons/activation_sweep_structured/i_9_p0.415.jpg]

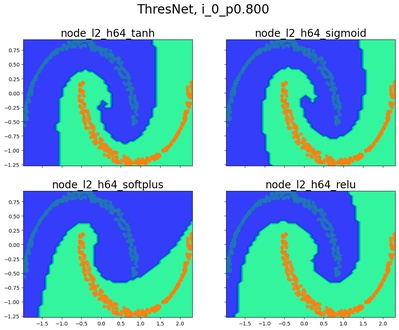

Supplement: Supplementary file 1 [file bf1b2f4b901c21a1d8645018ea9aeb05-Supplemental.zip › ablation_study/classification_moons/activation_sweep_unstructured/i_0_p0.800.jpg]

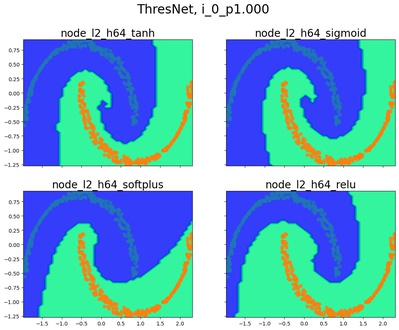

Supplement: Supplementary file 1 [file bf1b2f4b901c21a1d8645018ea9aeb05-Supplemental.zip › ablation_study/classification_moons/activation_sweep_unstructured/i_00_p1.000.jpg]

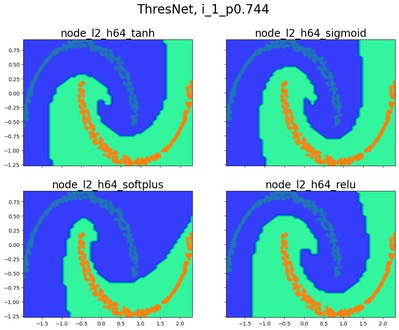

Supplement: Supplementary file 1 [file bf1b2f4b901c21a1d8645018ea9aeb05-Supplemental.zip › ablation_study/classification_moons/activation_sweep_unstructured/i_1_p0.744.jpg]

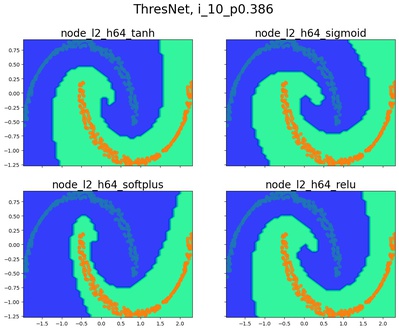

Supplement: Supplementary file 1 [file bf1b2f4b901c21a1d8645018ea9aeb05-Supplemental.zip › ablation_study/classification_moons/activation_sweep_unstructured/i_10_p0.386.jpg]

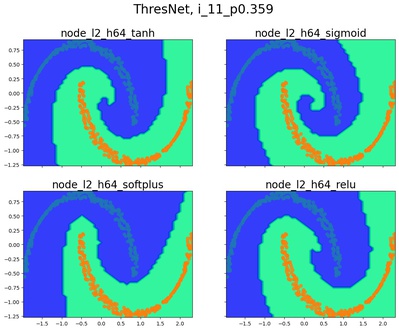

Supplement: Supplementary file 1 [file bf1b2f4b901c21a1d8645018ea9aeb05-Supplemental.zip › ablation_study/classification_moons/activation_sweep_unstructured/i_11_p0.359.jpg]

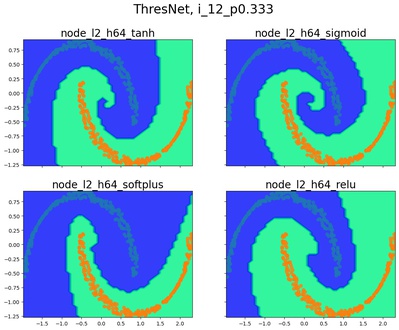

Supplement: Supplementary file 1 [file bf1b2f4b901c21a1d8645018ea9aeb05-Supplemental.zip › ablation_study/classification_moons/activation_sweep_unstructured/i_12_p0.333.jpg]

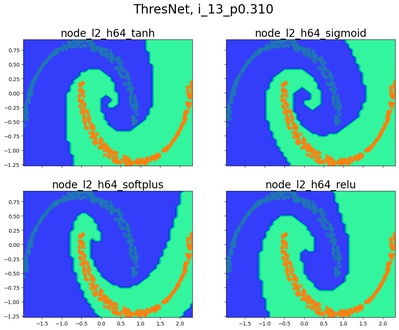

Supplement: Supplementary file 1 [file bf1b2f4b901c21a1d8645018ea9aeb05-Supplemental.zip › ablation_study/classification_moons/activation_sweep_unstructured/i_13_p0.310.jpg]

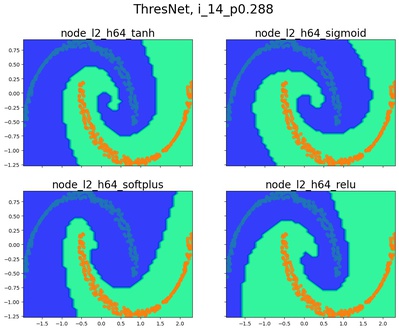

Supplement: Supplementary file 1 [file bf1b2f4b901c21a1d8645018ea9aeb05-Supplemental.zip › ablation_study/classification_moons/activation_sweep_unstructured/i_14_p0.288.jpg]

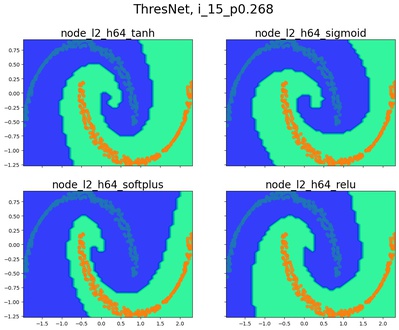

Supplement: Supplementary file 1 [file bf1b2f4b901c21a1d8645018ea9aeb05-Supplemental.zip › ablation_study/classification_moons/activation_sweep_unstructured/i_15_p0.268.jpg]

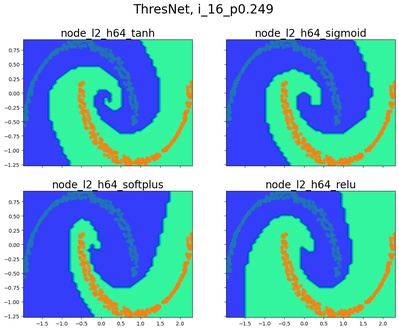

Supplement: Supplementary file 1 [file bf1b2f4b901c21a1d8645018ea9aeb05-Supplemental.zip › ablation_study/classification_moons/activation_sweep_unstructured/i_16_p0.249.jpg]

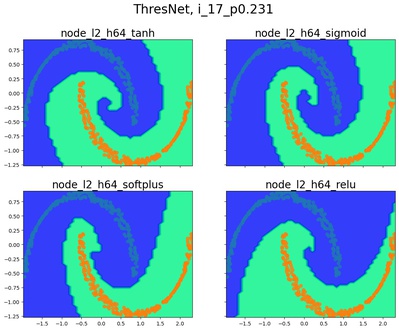

Supplement: Supplementary file 1 [file bf1b2f4b901c21a1d8645018ea9aeb05-Supplemental.zip › ablation_study/classification_moons/activation_sweep_unstructured/i_17_p0.231.jpg]

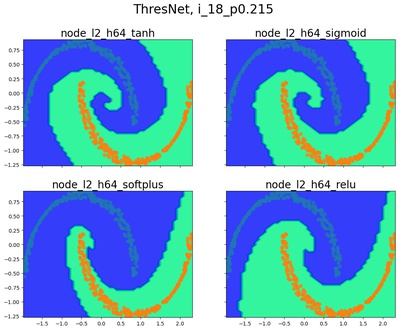

Supplement: Supplementary file 1 [file bf1b2f4b901c21a1d8645018ea9aeb05-Supplemental.zip › ablation_study/classification_moons/activation_sweep_unstructured/i_18_p0.215.jpg]

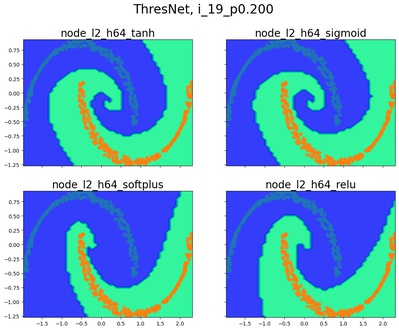

Supplement: Supplementary file 1 [file bf1b2f4b901c21a1d8645018ea9aeb05-Supplemental.zip › ablation_study/classification_moons/activation_sweep_unstructured/i_19_p0.200.jpg]

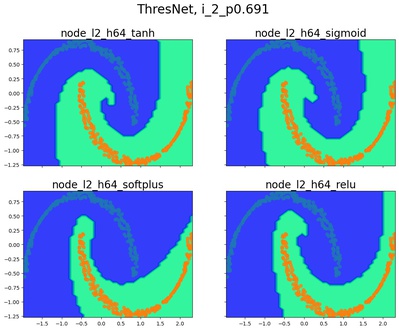

Supplement: Supplementary file 1 [file bf1b2f4b901c21a1d8645018ea9aeb05-Supplemental.zip › ablation_study/classification_moons/activation_sweep_unstructured/i_2_p0.691.jpg]

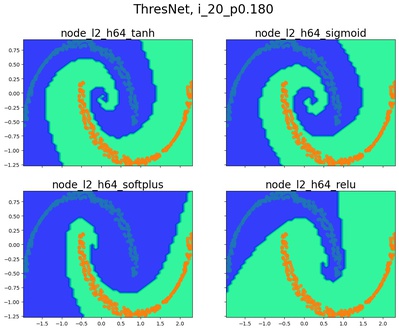

Supplement: Supplementary file 1 [file bf1b2f4b901c21a1d8645018ea9aeb05-Supplemental.zip › ablation_study/classification_moons/activation_sweep_unstructured/i_20_p0.180.jpg]

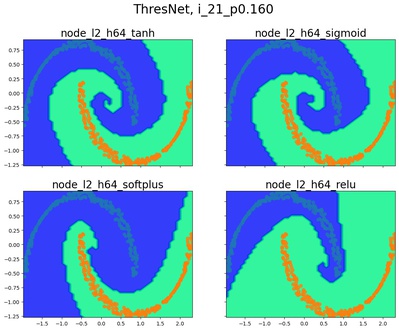

Supplement: Supplementary file 1 [file bf1b2f4b901c21a1d8645018ea9aeb05-Supplemental.zip › ablation_study/classification_moons/activation_sweep_unstructured/i_21_p0.160.jpg]

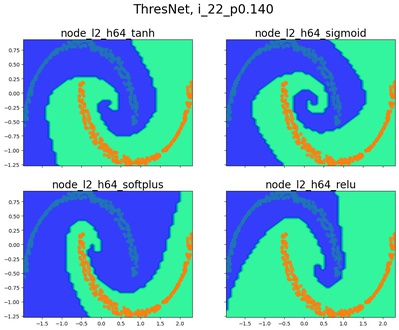

Supplement: Supplementary file 1 [file bf1b2f4b901c21a1d8645018ea9aeb05-Supplemental.zip › ablation_study/classification_moons/activation_sweep_unstructured/i_22_p0.140.jpg]

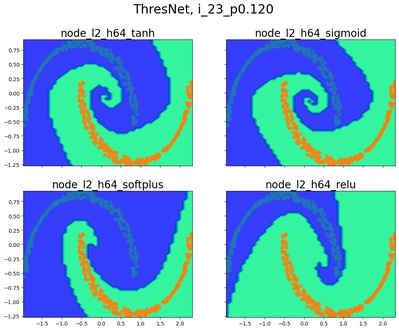

Supplement: Supplementary file 1 [file bf1b2f4b901c21a1d8645018ea9aeb05-Supplemental.zip › ablation_study/classification_moons/activation_sweep_unstructured/i_23_p0.120.jpg]

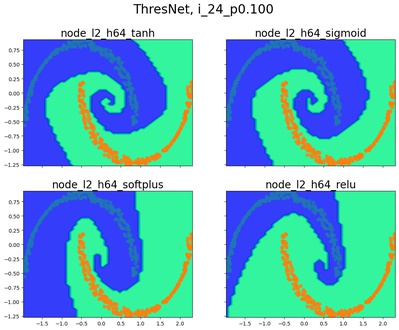

Supplement: Supplementary file 1 [file bf1b2f4b901c21a1d8645018ea9aeb05-Supplemental.zip › ablation_study/classification_moons/activation_sweep_unstructured/i_24_p0.100.jpg]

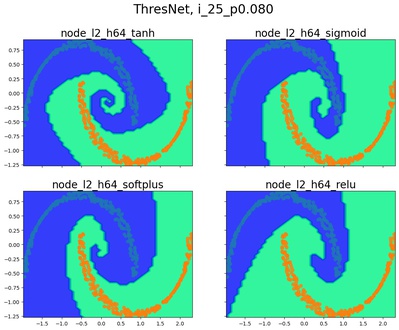

Supplement: Supplementary file 1 [file bf1b2f4b901c21a1d8645018ea9aeb05-Supplemental.zip › ablation_study/classification_moons/activation_sweep_unstructured/i_25_p0.080.jpg]

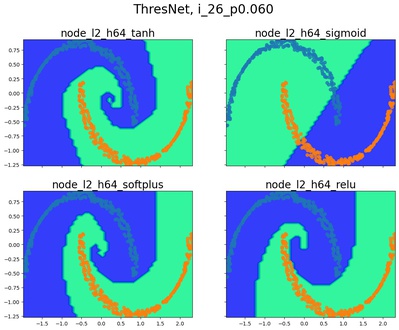

Supplement: Supplementary file 1 [file bf1b2f4b901c21a1d8645018ea9aeb05-Supplemental.zip › ablation_study/classification_moons/activation_sweep_unstructured/i_26_p0.060.jpg]

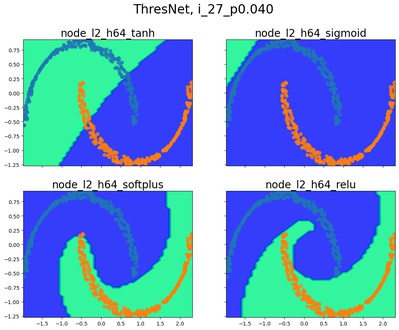

Supplement: Supplementary file 1 [file bf1b2f4b901c21a1d8645018ea9aeb05-Supplemental.zip › ablation_study/classification_moons/activation_sweep_unstructured/i_27_p0.040.jpg]

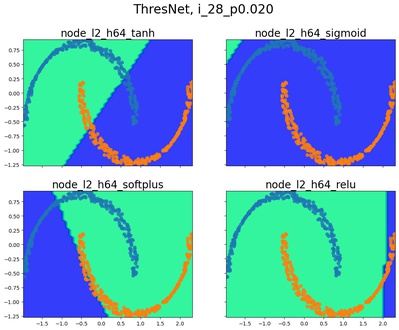

Supplement: Supplementary file 1 [file bf1b2f4b901c21a1d8645018ea9aeb05-Supplemental.zip › ablation_study/classification_moons/activation_sweep_unstructured/i_28_p0.020.jpg]

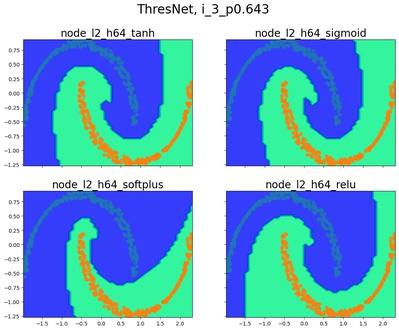

Supplement: Supplementary file 1 [file bf1b2f4b901c21a1d8645018ea9aeb05-Supplemental.zip › ablation_study/classification_moons/activation_sweep_unstructured/i_3_p0.643.jpg]

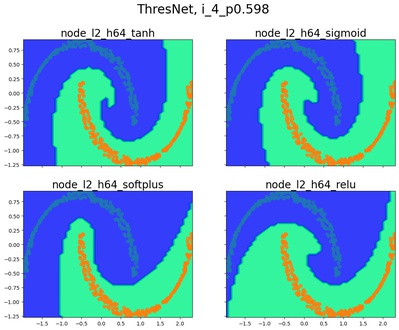

Supplement: Supplementary file 1 [file bf1b2f4b901c21a1d8645018ea9aeb05-Supplemental.zip › ablation_study/classification_moons/activation_sweep_unstructured/i_4_p0.598.jpg]

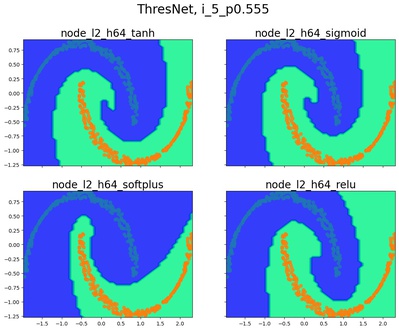

Supplement: Supplementary file 1 [file bf1b2f4b901c21a1d8645018ea9aeb05-Supplemental.zip › ablation_study/classification_moons/activation_sweep_unstructured/i_5_p0.555.jpg]

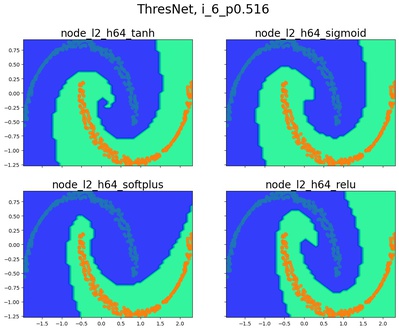

Supplement: Supplementary file 1 [file bf1b2f4b901c21a1d8645018ea9aeb05-Supplemental.zip › ablation_study/classification_moons/activation_sweep_unstructured/i_6_p0.516.jpg]

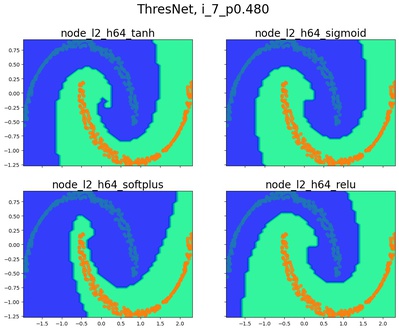

Supplement: Supplementary file 1 [file bf1b2f4b901c21a1d8645018ea9aeb05-Supplemental.zip › ablation_study/classification_moons/activation_sweep_unstructured/i_7_p0.480.jpg]

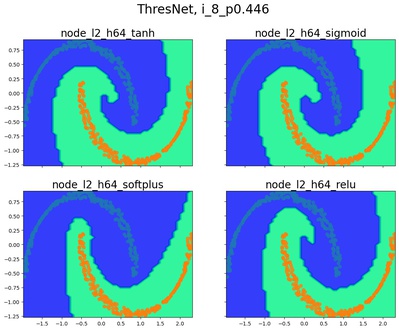

Supplement: Supplementary file 1 [file bf1b2f4b901c21a1d8645018ea9aeb05-Supplemental.zip › ablation_study/classification_moons/activation_sweep_unstructured/i_8_p0.446.jpg]

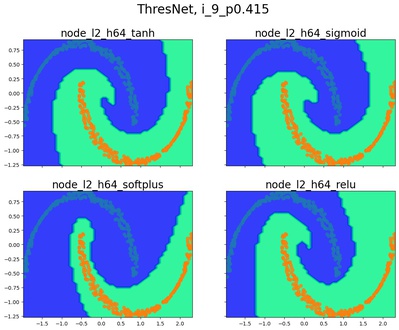

Supplement: Supplementary file 1 [file bf1b2f4b901c21a1d8645018ea9aeb05-Supplemental.zip › ablation_study/classification_moons/activation_sweep_unstructured/i_9_p0.415.jpg]

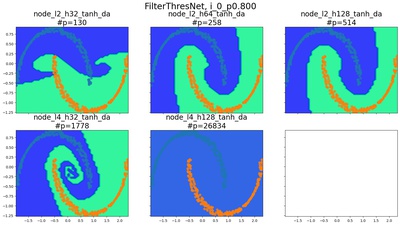

Supplement: Supplementary file 1 [file bf1b2f4b901c21a1d8645018ea9aeb05-Supplemental.zip › ablation_study/classification_moons/model_sweep_structured/i_0_p0.800.jpg]

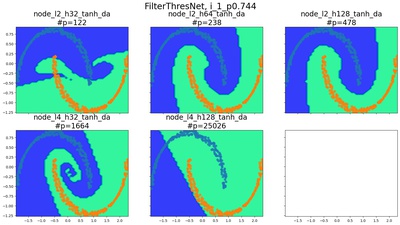

Supplement: Supplementary file 1 [file bf1b2f4b901c21a1d8645018ea9aeb05-Supplemental.zip › ablation_study/classification_moons/model_sweep_structured/i_1_p0.744.jpg]

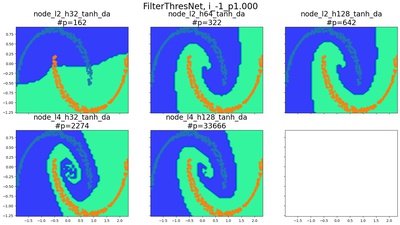

Supplement: Supplementary file 1 [file bf1b2f4b901c21a1d8645018ea9aeb05-Supplemental.zip › ablation_study/classification_moons/model_sweep_structured/i_-1_p1.000.jpg]

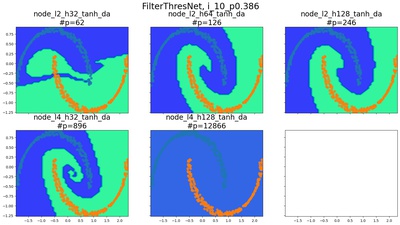

Supplement: Supplementary file 1 [file bf1b2f4b901c21a1d8645018ea9aeb05-Supplemental.zip › ablation_study/classification_moons/model_sweep_structured/i_10_p0.386.jpg]

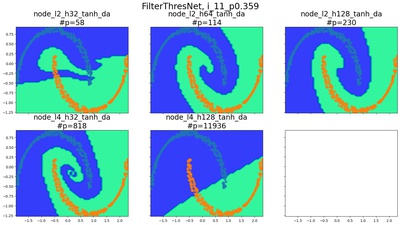

Supplement: Supplementary file 1 [file bf1b2f4b901c21a1d8645018ea9aeb05-Supplemental.zip › ablation_study/classification_moons/model_sweep_structured/i_11_p0.359.jpg]

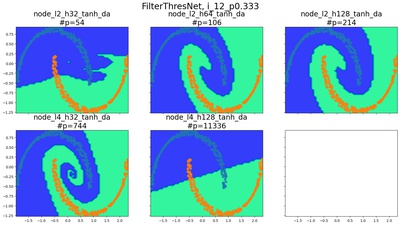

Supplement: Supplementary file 1 [file bf1b2f4b901c21a1d8645018ea9aeb05-Supplemental.zip › ablation_study/classification_moons/model_sweep_structured/i_12_p0.333.jpg]

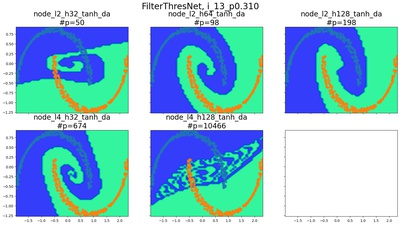

Supplement: Supplementary file 1 [file bf1b2f4b901c21a1d8645018ea9aeb05-Supplemental.zip › ablation_study/classification_moons/model_sweep_structured/i_13_p0.310.jpg]

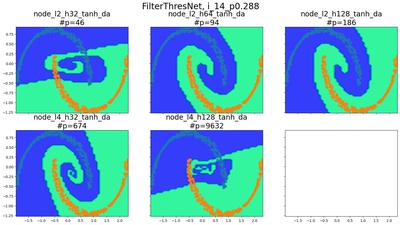

Supplement: Supplementary file 1 [file bf1b2f4b901c21a1d8645018ea9aeb05-Supplemental.zip › ablation_study/classification_moons/model_sweep_structured/i_14_p0.288.jpg]

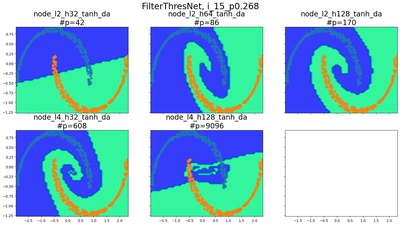

Supplement: Supplementary file 1 [file bf1b2f4b901c21a1d8645018ea9aeb05-Supplemental.zip › ablation_study/classification_moons/model_sweep_structured/i_15_p0.268.jpg]

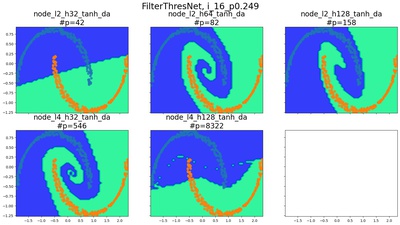

Supplement: Supplementary file 1 [file bf1b2f4b901c21a1d8645018ea9aeb05-Supplemental.zip › ablation_study/classification_moons/model_sweep_structured/i_16_p0.249.jpg]

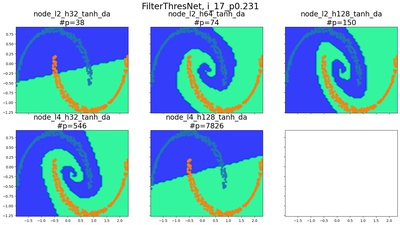

Supplement: Supplementary file 1 [file bf1b2f4b901c21a1d8645018ea9aeb05-Supplemental.zip › ablation_study/classification_moons/model_sweep_structured/i_17_p0.231.jpg]

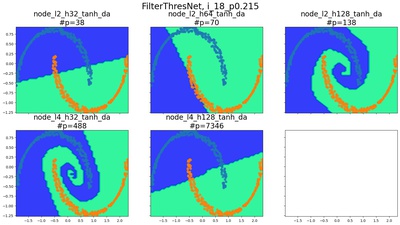

Supplement: Supplementary file 1 [file bf1b2f4b901c21a1d8645018ea9aeb05-Supplemental.zip › ablation_study/classification_moons/model_sweep_structured/i_18_p0.215.jpg]

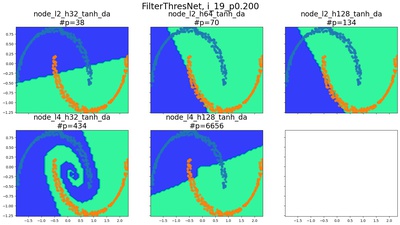

Supplement: Supplementary file 1 [file bf1b2f4b901c21a1d8645018ea9aeb05-Supplemental.zip › ablation_study/classification_moons/model_sweep_structured/i_19_p0.200.jpg]

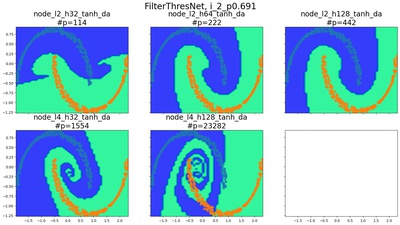

Supplement: Supplementary file 1 [file bf1b2f4b901c21a1d8645018ea9aeb05-Supplemental.zip › ablation_study/classification_moons/model_sweep_structured/i_2_p0.691.jpg]

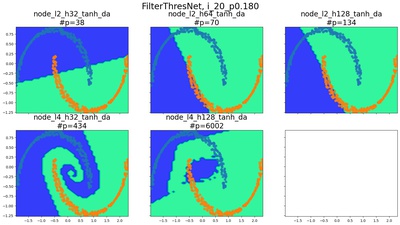

Supplement: Supplementary file 1 [file bf1b2f4b901c21a1d8645018ea9aeb05-Supplemental.zip › ablation_study/classification_moons/model_sweep_structured/i_20_p0.180.jpg]

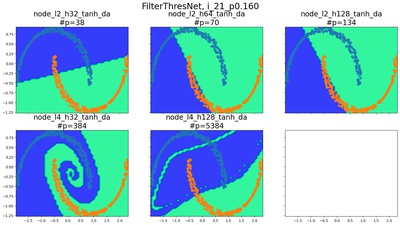

Supplement: Supplementary file 1 [file bf1b2f4b901c21a1d8645018ea9aeb05-Supplemental.zip › ablation_study/classification_moons/model_sweep_structured/i_21_p0.160.jpg]

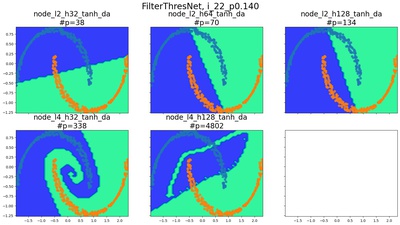

Supplement: Supplementary file 1 [file bf1b2f4b901c21a1d8645018ea9aeb05-Supplemental.zip › ablation_study/classification_moons/model_sweep_structured/i_22_p0.140.jpg]

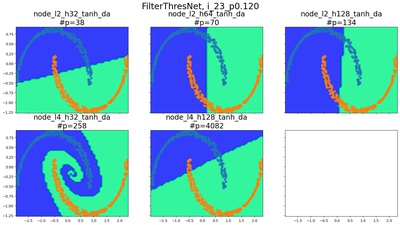

Supplement: Supplementary file 1 [file bf1b2f4b901c21a1d8645018ea9aeb05-Supplemental.zip › ablation_study/classification_moons/model_sweep_structured/i_23_p0.120.jpg]

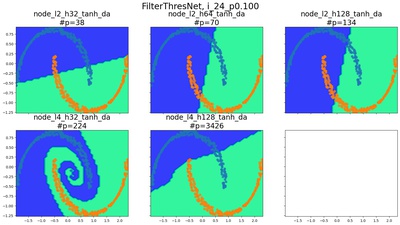

Supplement: Supplementary file 1 [file bf1b2f4b901c21a1d8645018ea9aeb05-Supplemental.zip › ablation_study/classification_moons/model_sweep_structured/i_24_p0.100.jpg]

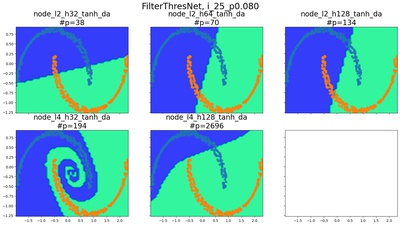

Supplement: Supplementary file 1 [file bf1b2f4b901c21a1d8645018ea9aeb05-Supplemental.zip › ablation_study/classification_moons/model_sweep_structured/i_25_p0.080.jpg]

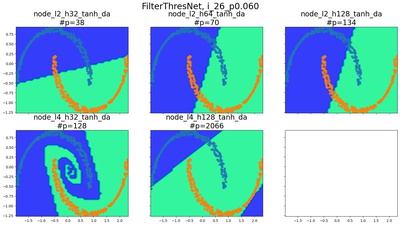

Supplement: Supplementary file 1 [file bf1b2f4b901c21a1d8645018ea9aeb05-Supplemental.zip › ablation_study/classification_moons/model_sweep_structured/i_26_p0.060.jpg]

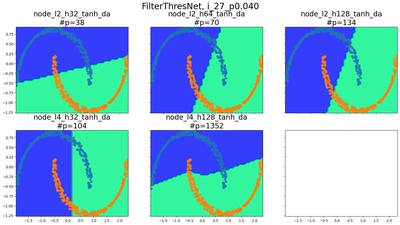

Supplement: Supplementary file 1 [file bf1b2f4b901c21a1d8645018ea9aeb05-Supplemental.zip › ablation_study/classification_moons/model_sweep_structured/i_27_p0.040.jpg]

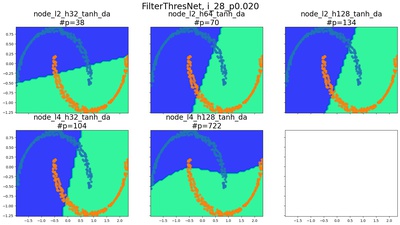

Supplement: Supplementary file 1 [file bf1b2f4b901c21a1d8645018ea9aeb05-Supplemental.zip › ablation_study/classification_moons/model_sweep_structured/i_28_p0.020.jpg]

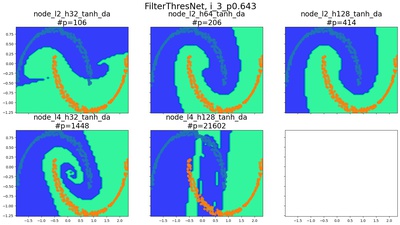

Supplement: Supplementary file 1 [file bf1b2f4b901c21a1d8645018ea9aeb05-Supplemental.zip › ablation_study/classification_moons/model_sweep_structured/i_3_p0.643.jpg]

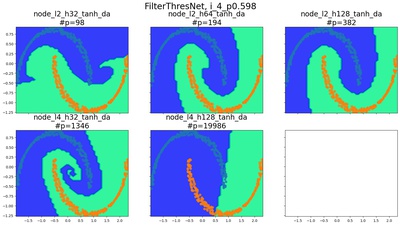

Supplement: Supplementary file 1 [file bf1b2f4b901c21a1d8645018ea9aeb05-Supplemental.zip › ablation_study/classification_moons/model_sweep_structured/i_4_p0.598.jpg]

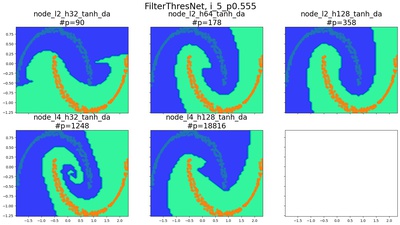

Supplement: Supplementary file 1 [file bf1b2f4b901c21a1d8645018ea9aeb05-Supplemental.zip › ablation_study/classification_moons/model_sweep_structured/i_5_p0.555.jpg]

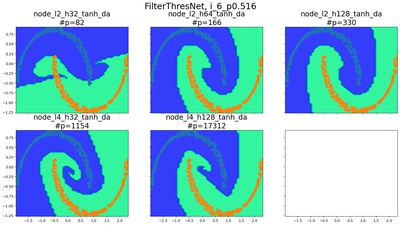

Supplement: Supplementary file 1 [file bf1b2f4b901c21a1d8645018ea9aeb05-Supplemental.zip › ablation_study/classification_moons/model_sweep_structured/i_6_p0.516.jpg]

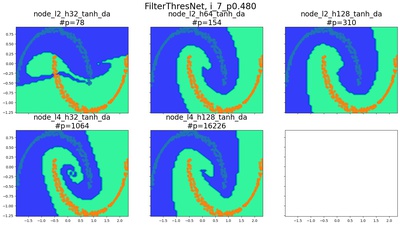

Supplement: Supplementary file 1 [file bf1b2f4b901c21a1d8645018ea9aeb05-Supplemental.zip › ablation_study/classification_moons/model_sweep_structured/i_7_p0.480.jpg]

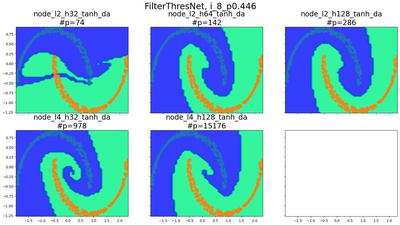

Supplement: Supplementary file 1 [file bf1b2f4b901c21a1d8645018ea9aeb05-Supplemental.zip › ablation_study/classification_moons/model_sweep_structured/i_8_p0.446.jpg]

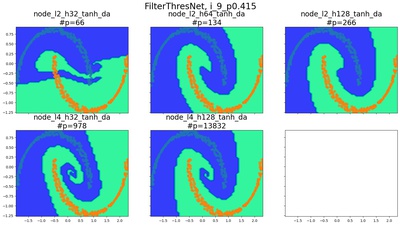

Supplement: Supplementary file 1 [file bf1b2f4b901c21a1d8645018ea9aeb05-Supplemental.zip › ablation_study/classification_moons/model_sweep_structured/i_9_p0.415.jpg]

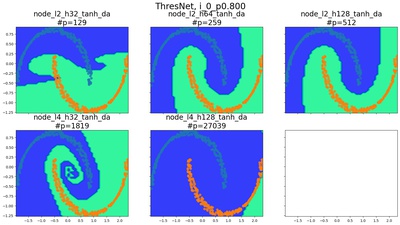

Supplement: Supplementary file 1 [file bf1b2f4b901c21a1d8645018ea9aeb05-Supplemental.zip › ablation_study/classification_moons/model_sweep_unstructured/i_0_p0.800.jpg]

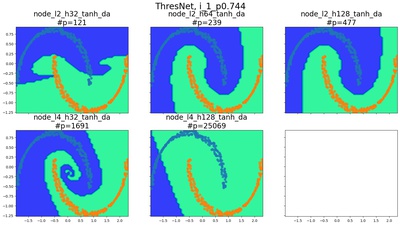

Supplement: Supplementary file 1 [file bf1b2f4b901c21a1d8645018ea9aeb05-Supplemental.zip › ablation_study/classification_moons/model_sweep_unstructured/i_1_p0.744.jpg]

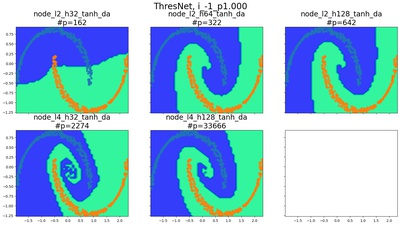

Supplement: Supplementary file 1 [file bf1b2f4b901c21a1d8645018ea9aeb05-Supplemental.zip › ablation_study/classification_moons/model_sweep_unstructured/i_-1_p1.000.jpg]

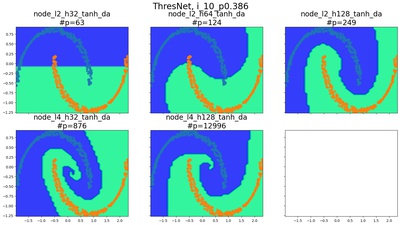

Supplement: Supplementary file 1 [file bf1b2f4b901c21a1d8645018ea9aeb05-Supplemental.zip › ablation_study/classification_moons/model_sweep_unstructured/i_10_p0.386.jpg]

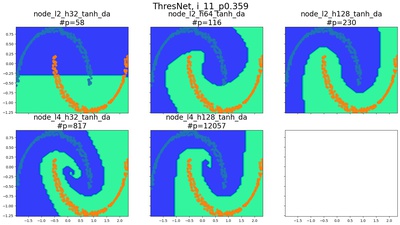

Supplement: Supplementary file 1 [file bf1b2f4b901c21a1d8645018ea9aeb05-Supplemental.zip › ablation_study/classification_moons/model_sweep_unstructured/i_11_p0.359.jpg]

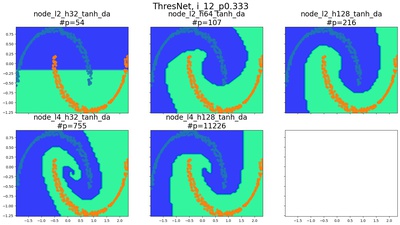

Supplement: Supplementary file 1 [file bf1b2f4b901c21a1d8645018ea9aeb05-Supplemental.zip › ablation_study/classification_moons/model_sweep_unstructured/i_12_p0.333.jpg]

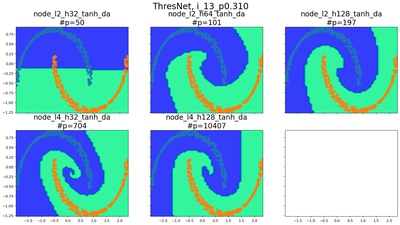

Supplement: Supplementary file 1 [file bf1b2f4b901c21a1d8645018ea9aeb05-Supplemental.zip › ablation_study/classification_moons/model_sweep_unstructured/i_13_p0.310.jpg]

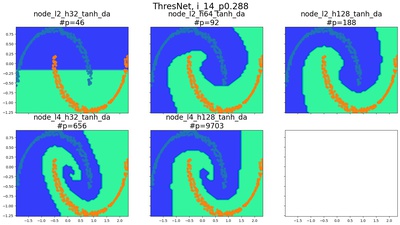

Supplement: Supplementary file 1 [file bf1b2f4b901c21a1d8645018ea9aeb05-Supplemental.zip › ablation_study/classification_moons/model_sweep_unstructured/i_14_p0.288.jpg]

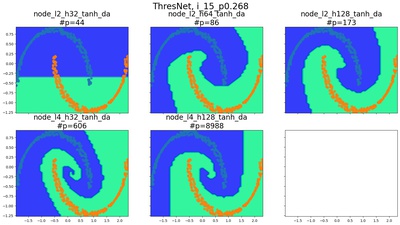

Supplement: Supplementary file 1 [file bf1b2f4b901c21a1d8645018ea9aeb05-Supplemental.zip › ablation_study/classification_moons/model_sweep_unstructured/i_15_p0.268.jpg]

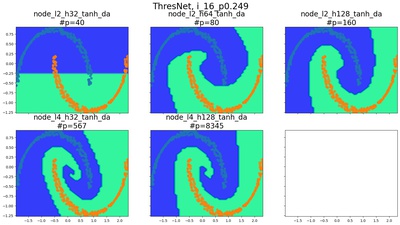

Supplement: Supplementary file 1 [file bf1b2f4b901c21a1d8645018ea9aeb05-Supplemental.zip › ablation_study/classification_moons/model_sweep_unstructured/i_16_p0.249.jpg]
